# Supplementary material
Source: Research Square preprint supplement (doi:10.21203/rs.3.rs-9577744/v1)
Supplement: Supplementary file 1 [file 707dfd51022b2965a5c11c28.docx]

**Appendix**

**Title: Non-consumptive Effects of Odonate Predators on Pollinators of Water Lilies**

**Authors**: Ole Rieken1*, Rebecca Oester1,2

**Affiliations**:

1: Animal Network Ecology, Department of Biology, University of Hamburg, Hamburg 20148, Germany

2: Forest Entomology, Forest Health and Biotic Interactions, WSL, Birmensdorf 8903, Switzerland

* Corresponding author: [ole.rieken@gmail.com](mailto:ole.rieken@gmail.com)

**Table S1:** Hypotheses for links between wind and weather, odonate abundance, visit duration and both artificial dragonfly and neutral treatment.

| **Hypotheses** | **Explanation** | **Source** |
| --- | --- | --- |
| I expect odonate abundance to be **negatively correlated** with wind. | Wind may reduce odonate flight activity and hunting efficiency. This may cause a temporary decrease in odonate abundance. | (Mason 2017, Rüppel & Hilfert-Rüppel 2024) |
| I expect odonate abundance to be **positively correlated** with clear weather. | Odonates benefit from direct sunlight for thermoregulation. Clear weather may increase odonate abundance. | (De Marco Jr. and Resende 2002, Hunger 1998, Worthen and Guevara Mora 2024) |
| I expect a **negative correlation** between wind and clear weather | Although not strictly linked. Some combinations of wind and weather (here cloud cover) may co-occur more frequently than others, as both are influenced by overarching weather patterns. | (Bissolli and Dittmann 2001, Krähenmann et al. 2018) |
| I expect visit duration to be **negatively associated** with odonate abundance. | Odonates may disturb pollinator behaviour through predation risk. Pollinators may trade off foraging efficiency for safety under predation risk, reducing visit duration. | (Knight et al. 2005) |
| I expect a **positive indirect association** of visit duration with wind, mediated by odonate abundance. | Wind may reduce odonate flight activity and hunting efficiency. A consequent decrease in odonate abundance may lead to reduced perceived predation risk, allowing pollinators to extend their visit duration. | (Knight et al. 2005, Rüppel and Hilfert-Rüppel 2024) |
| I expect a **negative indirect association** of visit duration with clear weather, mediated by odonate abundance. | Clear weather may increase odonate abundance. Spikes in odonate abundance may lead to elevated predation risk, causing pollinators to trade safety for foraging efficiency, lowering visit duration. | (De Marco Jr. and Resende 2002, Hunger 1998, Knight et al. 2005, Romero et al. 2011) |
| I expect neutral objects to have **no effect** on visit duration. | Neutral objects were not expected to influence visit duration, as they should not signal predation risk. |  |
| I expect artificial dragonflies to **decrease** visit duration. | Artificial predators can act as visual predation cues, decreasing foraging efficiency of pollinators through perceived predation risk. | (Gonçalves-Souza et al. 2008) |

**Table S2:** Model fit indices for structural equation models.

| **Fit Index** | **Diptera (n = 281)** | **Hymenoptera (n = 162)** |
| --- | --- | --- |
| χ² | 9.917 | 15.797 |
| p-value | 0.271 | 0.045 |
| RMSEA | 0.029 | 0.078 |
| 90 % CI RMSEA | 0.000 – 0.079 | 0.011 – 0.134 |
| SRMR | 0.032 | 0.055 |
| CFI | 0.984 | 0.886 |
| TLI | 0.972 | 0.800 |

**References**

Bissolli P, Dittmann E (2001) The objective weather type classification of the German Weather Service and its possibilities of application to environmental and meteorological investigations. Meteorologische Zeitschrift 10:253–260. <https://doi.org/10.1127/0941-2948/2001/0010-0253>

De Marco Jr. P, Resende DC (2002) Activity patterns and thermoregulation in a tropical dragonfly assemblage. Odonatologica 31:129–138.

Gonçalves-Souza T, Omena PM, Souza JC, Romero GQ (2008) Trait-mediated effects on flowers: Artificial spiders deceive pollinators and decrease plant fitness. Ecology 89:2407–2413. <https://doi.org/10.1890/07-1881.1>

Hunger H (1998) Biozönologische Untersuchungen zum Habitatschema des Kleinen Granatauges (*Erythromma viridulum* Charpentier 1840) in der südlichen Oberrheinebene.

Knight TM, McCoy MW, Chase JM, McCoy KA, Holt RD (2005) Trophic cascades across ecosystems. Nature 437:880–883. <https://doi.org/10.1038/nature03962>

Krähenmann S, Walter A, Brienen S, Imbery F, Matzarakis A (2018) High-resolution grids of hourly meteorological variables for Germany. Theoretical and Applied Climatology 131:899–926. <https://doi.org/10.1007/s00704-016-2003-7>

Mason NA (2017) Effects of wind, ambient temperature and sun position on damselfly flight activity and perch orientation. Animal Behaviour 124:175–181.

Romero GQ, Antiqueira PAP, Koricheva J (2011) A Meta-Analysis of Predation Risk Effects on Pollinator Behaviour. PLoS ONE 6:e20689. <https://doi.org/10.1371/journal.pone.0020689>

Rüppell G, Hilfert-Rüppell D (2024) Verhalten von Libellen. Springer Berlin Heidelberg, Berlin, Heidelberg. <https://doi.org/10.1007/978-3-662-69252-3>

Worthen W, Guevara Mora M (2024) The Effects of Light Environment on Adult Odonate Communities in Disturbed and Intact Forest: The Importance of Small- Scale Effects. Diversity 16:557. <https://doi.org/10.3390/d16090557>
